# Supplementary material for: Highly divergent 16S rRNA sequences in ribosomal operons of Scytonema hyalinum (Cyanobacteria)
Source: PubMed Central journal article supplement (PMC5658200; doi:10.1371/journal.pone.0186393), 2017-10-26
Supplement: pone.0186393.s004.pdf [file pone.0186393.s004.pdf]

**S4 Table. Summary of NCBI accession numbers for *rbcLX*, *rpoC1*, and *nifD* nucleotide sequences obtained in this study.**

| Strain                                                      | NCBI Accession |              |             |
|-------------------------------------------------------------|----------------|--------------|-------------|
|                                                             | <i>rbcLX</i>   | <i>rpoC1</i> | <i>nifD</i> |
| <i>Scytonema arcangeli</i> M09                              | KY417041       | KY423285     | KY416993    |
| <i>Scytonema hyalinum</i> sp. 5 ATA-SAL-RM1                 | KY417083       | KY423327     | KY417035    |
| <i>Scytonema hyalinum</i> sp. 5 HA4185-MV1                  | KY417084       | KY423328     | KY417036    |
| <i>Scytonema arcangeli</i> THH60                            | KY417042       | KY423286     | KY416994    |
| <i>Scytonema arcangeli</i> Valle de Zapotitlan              | KY417046       | KY423290     | KY416998    |
| <i>Scytonema hyalinum</i> sp. 2 F10-MK28                    | KY417044       | KY423288     | KY416996    |
| <i>Scytonema hyalinum</i> sp. 3 HAF2-B2-c1                  | KY417081       | KY423325     | KY417033    |
| <i>Scytonema hyalinum</i> sp. 4 HTT-U-KK4                   | KY417082       | KY423326     | KY417034    |
| <i>Scytonema hyalinum</i> sp. 1 PT10-MK84                   | KY417045       | KY423289     | KY416997    |
| <i>Scytonema hyalinum</i> sp. 1 FI5-JRJ03                   | KY417048       | KY423292     | KY417000    |
| <i>Scytonema hyalinum</i> sp. 1 EM3-Z1-c02                  | KY417049       | KY423293     | KY417001    |
| <i>Scytonema hyalinum</i> sp. 1 EM3-HA19                    | KY417050       | KY423294     | KY417002    |
| <i>Scytonema hyalinum</i> sp. 1 EM3-HA25                    | KY417051       | KY423295     | KY417003    |
| <i>Scytonema hyalinum</i> sp. 1 EM3-HA15                    | KY417052       | KY423296     | KY417004    |
| <i>Scytonema hyalinum</i> sp. 1 EM3-HA20                    | KY417053       | KY423297     | KY417005    |
| <i>Scytonema hyalinum</i> sp. 1CMT-1SWIN-NPC17              | KY417076       | KY423320     | KY417028    |
| <i>Scytonema hyalinum</i> sp. 1 CXA108-5-BZ                 | KY417074       | KY423318     | KY417026    |
| <i>Scytonema hyalinum</i> sp. 1 CNP2-Z1-c01                 | KY417077       | KY423321     | KY417029    |
| <i>Scytonema hyalinum</i> sp. 1 CMT-1BRIN-NPC31             | KY417075       | KY423319     | KY417027    |
| <i>Scytonema hyalinum</i> sp. 1 WJT71-NPBG27                | KY417085       | KY423329     | KY417037    |
| <i>Scytonema hyalinum</i> sp. 1 WJT73-NPBG6C                | KY417086       | KY423330     | KY417038    |
| <i>Scytonema hyalinum</i> sp. 1 WJT4-NPBG1                  | KY417078       | KY423322     | KY417030    |
| <i>Scytonema hyalinum</i> sp. 1 WJT9-NPBG6A                 | KY417079       | KY423323     | KY417031    |
| <i>Scytonema hyalinum</i> sp. 1 WJT9-NPBG6B                 | KY417080       | KY423324     | KY417032    |
| <i>Scytonema hyalinum</i> sp. 1 DV1-KK3                     | KY417047       | KY423291     | KY416999    |
| <i>Brasilonema</i> sp. CR06-4B/1                            | KY417056       | KY423300     | KY417008    |
| <i>Brasilonema</i> sp. BZ-HDL-007                           | KY417055       | KY423299     | KY417007    |
| <i>Brasilonema</i> sp. KEN-MK50                             | KY417059       | KY423303     | KY417011    |
| <i>Brasilonema</i> sp. CR6-5A/1                             | KY417057       | KY423301     | KY417009    |
| <i>Brasilonema</i> sp. M31-F20B                             | KY417058       | KY423302     | KY417010    |
| <i>Brasilonema</i> sp. TH04-Ema                             | KY417061       | KY423305     | KY417013    |
| <i>Brasilonema</i> sp. P09-MK13                             | KY417054       | KY423298     | KY417006    |
| <i>Brasilonema</i> sp. PT5-MK70                             | KY417060       | KY423304     | KY417012    |
| <i>Scytonema stuposum</i> M10-F15A                          | KY417066       | KY423310     | KY417018    |
| <i>Scytonema</i> cf. <i>chiastum</i> M32-F26III             | KY417064       | KY423308     | KY417016    |
| <i>Scytonema</i> cf. <i>chiastum</i> F04-MK25               | KY417062       | KY423306     | KY417014    |
| <i>Scytonema</i> cf. <i>chiastum</i> GSE-NOS-MK14-07B       | KY417063       | KY423307     | KY417015    |
| <i>Hassallia</i> sp. CMT-1BRIN-NPC13                        | KY417069       | KY423313     | KY417021    |
| <i>Hassallia</i> sp. CMT-1SZIN-NPC9                         | KY417070       | KY423314     | KY417022    |
| <i>Hassallia</i> sp. CMT-2BRIN-HLNPC9                       | KY417071       | KY423315     | KY417023    |
| <i>Hassallia</i> sp. CXA109-3-BZ                            | KY417073       | KY423317     | KY417025    |
| <i>Hassallia</i> sp. CMT-3SWIN-NPC18                        | KY417072       | KY423316     | KY417024    |
| <i>Roholtiella mojaviensis</i> WJT36-NPBG10 str. CCALA1051  | KY417088       | KY423331     | KY417040    |
| <i>Roholtiella mojaviensis</i> WJT36-NPBG5B str. CCALA 1052 | KY417087       | KY423332     | KY417039    |
| <i>Scytonema</i> sp. FM5-MK45                               | KY417065       | KY423309     | KY417017    |
| <i>Scytonematopsis</i> sp. M07                              | KY417067       | KY423311     | KY417019    |
| <i>Scytonematopsis</i> sp. PNG7-MK64                        | KY417068       | KY423312     | KY417020    |
