# Supplementary material for: Highly divergent 16S rRNA sequences in ribosomal operons of Scytonema hyalinum (Cyanobacteria)
Source: PLoS One. 2017 Oct 26;12(10):e0186393. doi: 10.1371/journal.pone.0186393 (PMC5658200; doi:10.1371/journal.pone.0186393)
Supplement: S3 Table — Color coding: yellow = consensus bases consistent with Type 2 operons; blue = consensus bases consistent with Type 1 operons; green = consensus bases unique to Brasilonema; gray = variable bases not consistent with any consensus base. Question marks = missing data. Helix number given in accordance to Fig 2, with position numbers based on 1501 positions in alignment of complete 16S rRNA molecule in Scytonema hyalinum sensu lato. Brasilonema is 54% like Type 2 operons, 28% like Type 1 operons, and 19% unique to Brasilonema or variable (consensus with < 85% saturation). (PDF) [file pone.0186393.s003.pdf]

**S3 Table. Alignment of bases consistently variable between operons in *Scytonema hyalinum*.** Color coding: yellow = consensus bases consistent with Type 2 operons; blue = consensus bases consistent with Type 1 operons; green = consensus bases unique to *Brasilonema*; gray = variable bases not consistent with any consensus base. Question marks = missing data. Helix number given in accordance to Fig. 2, with position numbers based on 1501 positions in alignment of complete 16S rRNA molecule in *Scytonema hyalinum sensu lato*. *Brasilonema* is 54% like Type 2 operons, 28% like Type 1 operons, and 19% unique to *Brasilonema* or variable (consensus with < 85% saturation).

[illegible]
